# Supplementary material for: A corus line: nanophase diagrams of miscible bimetallic nanoparticles
Source: Royal Society of Chemistry journal article supplement (doi:10.1039/d5nr03697f), 2025-01-01
Supplement: d5nr03697f3.pdf [file d5nr03697f3.pdf]

## A Corus Line: Nanophase Diagrams of Miscible Bimetallic Nanoparticles

Zhixuan Lin<sup>1</sup>, E. Toulkeridou<sup>2</sup>, Junlei Zhao<sup>3</sup>, Yue Wang<sup>1</sup>, Jeffrey E. Shield<sup>4,5</sup>, and P. Grammatikopoulos<sup>1,6,7\*</sup>

<sup>1</sup>Materials Science and Engineering, Guangdong Technion – Israel Institute of Technology, Shantou, Guangdong 515063, China

<sup>2</sup>Guangdong Technion – Israel Institute of Technology, Shantou, Guangdong 515063, China

<sup>3</sup>Department of Electronic and Electrical Engineering, Southern University of Science and Technology, Shenzhen 518055, China

<sup>4</sup>Mechanical and Materials Engineering, University of Nebraska-Lincoln, Lincoln, NE, 68588, USA

<sup>5</sup>Nebraska Center for Materials and Nanoscience, University of Nebraska-Lincoln, Lincoln, NE, 68588, USA

<sup>6</sup>Guangdong Provincial Key Laboratory of Materials and Technologies for Energy Conversion, Guangdong Technion – Israel Institute of Technology, Shantou, Guangdong 515063, China

<sup>7</sup>Instituto Regional de Investigación Científica Aplicada (IRICA) and Departamento de Física, Universidad de Castilla-La Mancha, 13071, Ciudad Real, Spain

E-mail: [panagiotis.g@gtiit.edu.cn](mailto:panagiotis.g@gtiit.edu.cn)

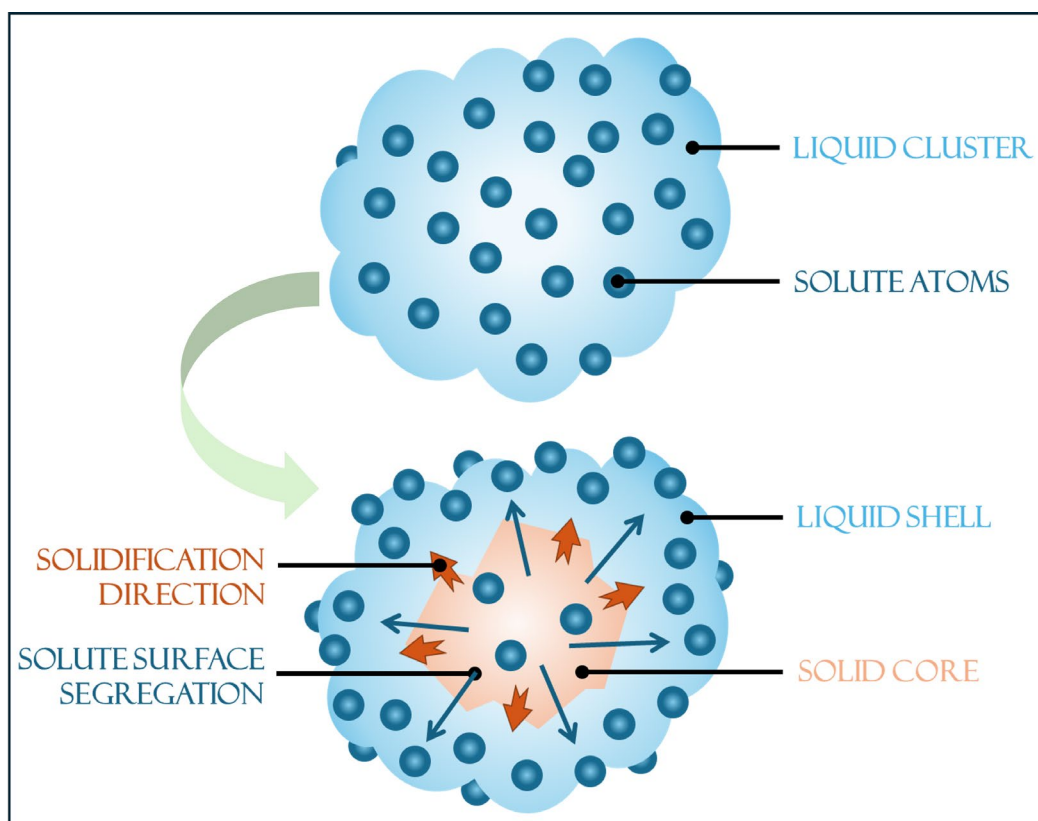

## 1. Regular solution model

To construct the phase diagram of nanoparticles (NPs), the regular solution model was employed to investigate their melting points. In an ideal solution, the assumption for the heat of mixing of its components is zero, and the entropy of mixing takes the same form as for ideal gases, where  $n$  is the total number of atoms,  $x_1$  and  $x_2$ , corresponding to atoms of species A and B:

$$\Delta S_{\text{mix}} = -nR(x_1 \ln x_1 + x_2 \ln x_2) \quad (\text{S1})$$

The regular solution model, originally introduced by Hildebrandt and later generalised by Guggenheim, assumes negligible entropy change when a small quantity of a component is transferred from an ideal solution of similar composition, with the total volume remaining unchanged. This concept is explicitly stated by Guggenheim [S1]:

*“A regular solution is one involving no entropy change when a small amount of one of its components is transferred to it from an ideal solution of the same composition, the total volume remaining unchanged.”*

In this model, the entropy of mixing is treated as described in Eq. (S1), while acknowledging potential non-ideal behaviour. The focus of the regular solution model is on deviations of the enthalpy of mixing from its ideal values, which is a crucial aspect for solutions like metallic alloys. Several main assumptions are also made, including that (i) the interatomic interactions are pairwise; (ii) the coordination number  $z$  remains consistent across the solution and each of the pure components; (iii) interactions between atoms are limited to their  $z$  nearest neighbours; (iv) the interaction energy associated with a pair of atoms only depends on the type of atoms and not their concentration; (v) the occupancy of a site by an atom type is governed solely by the atom's concentration, without influence from neighbouring site occupancies [S2].

Utilising the regular solution model greatly simplifies the analysis of complex solutions, providing a dependable basis for computation. By bridging the gap between ideal and non-ideal solutions, the regular solution theory provides a framework for understanding and predicting the behaviour of systems that deviate from ideal solution assumptions [S1,S2]. However, this approach is not flawless due to its oversimplifying assumption and cannot perform well when the system is characterised by non-ideal mixing and complex atomic interactions. Besides, the model may predict a perfectly spherical structure where all atoms are precisely positioned in their ideal lattice sites, without any surface roughness or atomic-level deviations. Such perfect shapes are difficult to achieve by either experimental investigations or molecular dynamics (MD) simulations. Experimentally prepared NPs often exhibit surface defects, atomic-scale roughness, and may even be truncated or non-spherical. Similarly, in MD simulations, due to the complex

interactions and dynamical processes between atoms, the shapes of NPs can also deviate from their ideal geometric forms. Therefore, although the regular solution model provides a theoretical reference framework, one must be aware of the discrepancies between its predictions and reality.

## 2. Construction of nanophase diagrams

For the application of the regular solution model, the expressions for the solidus-liquidus line have been described by Guisbiers *et al.* [S3]. The method has been shown to work well for miscible systems [S4]:

$$\begin{aligned} RT \ln \left( \frac{x_{\text{solidus}}}{x_{\text{liquidus}}} \right) &= \Delta H_m^A \left( 1 - \frac{T}{T_m^A} \right) + \Omega_l (1 - x_{\text{liquidus}})^2 - \Omega_s (1 - x_{\text{solidus}})^2 \\ RT \ln \left( \frac{1 - x_{\text{solidus}}}{1 - x_{\text{liquidus}}} \right) &= \Delta H_m^B \left( 1 - \frac{T}{T_m^B} \right) + \Omega_l x_{\text{liquidus}}^2 - \Omega_s x_{\text{solidus}}^2 \end{aligned} \quad (\text{S2})$$

In Eq. (S2),  $R = N_0 K_b$  is the ideal gas constant,  $x_{\text{liquidus}}$  and  $x_{\text{solidus}}$  are the compositions of liquid and solid phases at temperature  $T$ ,  $\Omega_l$  and  $\Omega_s$  are the size-dependent interaction parameters/energy in the liquid and solid phases,  $T_m^A$  and  $T_m^B$  are the melting temperature of pure components A and B,  $\Delta H_m^A$  and  $\Delta H_m^B$  are the molar mixing enthalpies of A and B. Therefore, with specific  $T$ ,  $x_{\text{liquidus}}$  and  $x_{\text{solidus}}$  values,  $\Omega_{l,\infty}$  and  $\Omega_{s,\infty}$  can then be determined. ( $\Omega_{l,\infty}$  and  $\Omega_{s,\infty}$  corresponding to the  $\Omega_l$  and  $\Omega_s$  at bulk situation.) This paper hereby firstly determined  $x_{\text{liquidus}}$  and  $x_{\text{solidus}}$  at  $T \cong (T_m^A + T_m^B)/2$  of their bulk phase diagram.

To transform bulk phase diagrams to nanoscale phase diagrams, all size-dependent parameters need to be reevaluated. A linear function of  $1/D$ , where  $D$  is the length edge of a polyhedral NP, is used:

$$\frac{\Phi}{\Phi_\infty} = 1 - \frac{\alpha_{\text{shape}}}{D} \quad (\text{S3})$$

where  $\Phi$  and  $\Phi_\infty$  are the nanoscale and bulk property parameters, respectively (namely,  $T_m^A$  and  $T_m^B$ ,  $\Delta H_m^A$  and  $\Delta H_m^B$ ,  $\Omega_l^A$  and  $\Omega_s^B$ ). The shape-dependent parameter  $\alpha_{\text{shape}}$ , which quantifies the size effect on the material property, is defined as:

$$\alpha_{\text{shape}} = \frac{AD(\gamma_s - \gamma_l)}{V\Delta H_{m,\infty}} \quad (\text{S4})$$

where  $A/V$  is the surface area-to-volume ratio,  $\Delta H_{m,\infty}$  is the bulk melting enthalpy, and  $\gamma_{s(l)}$  is the surface energy in the solid (liquid) state [S4]. The ratio between the number of surface atoms and the total number of atoms can be generalised as:

$$\frac{N_{\text{surf}}}{N_{\text{tot}}} = X_{\text{hkl}} a \frac{A}{V} \quad (\text{S5})$$

where  $X_{\text{hkl}}$  is a numerical constant which only depends on the crystal orientation, and  $a$  is the bulk lattice parameter [S5]. Combining Eqs. (S3), (S4), and (S5) we get Eq. (S6):

$$\frac{\Phi}{\Phi_{\infty}} = 1 + \left( \frac{N_{\text{surf}}}{N_{\text{tot}}} \frac{1}{a X_{\text{hkl}}} \right) \left( \frac{\gamma_l - \gamma_s}{\Delta H_{\text{m},\infty}} \right) \Leftrightarrow \frac{\Phi}{\Phi_{\infty}} = 1 + \left( \frac{A}{V} \right) \left( \frac{\gamma_l - \gamma_s}{\Delta H_{\text{m},\infty}} \right) \quad (\text{S6})$$

For every material and for different sizes [S4]:

$$\gamma_s = \frac{N_{\text{shape1}} A_{\text{shape1}} \gamma_{\text{shape1}} + N_{\text{shape2}} A_{\text{shape2}} \gamma_{\text{shape2}} + \dots}{A} \quad (\text{S7})$$

Using the surface area and volume equations specific to the shape of the NPs, the values of  $A$  and  $V$  can be geometrically derived. Consequently, all the parameters in Eq. (S5) are known, enabling the calculation of  $\Phi$ . Substituting the calculated parameters, the size-dependent interaction  $\Omega_{\text{s(l)}}$  can be determined, which enables derivation of the phase diagram for all nm-scale particles by multiplying the nanoscale with the bulk property parameter.

It should be noted that when the particle size shrinks below  $\sim 3$  nm, the lattice constant and surface energy may display a weak size dependence, which may limit the accuracy of the calculation method, thus making the produced nanophase diagram less reliable. Furthermore, below 3 nm, the thermodynamic stability of the clusters may also decrease, making it difficult to reflect phase transition behaviour. Therefore, to ensure that the investigation is conducted within a relatively reliable size range, avoid errors introduced at smaller scales, and guarantee thermodynamic stability, we started our calculations from 3 nm, to obtain more reliable results.

**Table S1:** Material property values from the literature used for the calculations. We opted for a limited number of sources for consistency.

| Material properties                                         | Ni      | Pt     | Au      | Pd     |
|-------------------------------------------------------------|---------|--------|---------|--------|
| Crystal structure                                           | fcc     | fcc    | fcc     | fcc    |
| $T_{\text{melt},\infty}$ (K) <sup>[S7]</sup>                | 1728.3  | 2041.5 | 1337.33 | 1828   |
| density (g/cm <sup>3</sup> ) <sup>[S7]</sup>                | 8.9     | 21.4   | 19.3    | 12     |
| atomic weight (g/mol) <sup>[S7]</sup>                       | 195.084 | 58.693 | 196.967 | 106.42 |
| $\gamma_{\text{s},111}$ (J/m <sup>2</sup> ) <sup>[S8]</sup> | 2.011   | 2.299  | 1.283   | 1.92   |
| $\gamma_{\text{s},100}$ (J/m <sup>2</sup> ) <sup>[S8]</sup> | 2.426   | 2.734  | 1.627   | 2.326  |
| $\gamma_{\text{s},110}$ (J/m <sup>2</sup> ) <sup>[S8]</sup> | 2.368   | 2.819  | 1.7     | 2.225  |
| $\gamma_l$ (J/m <sup>2</sup> ) <sup>[S7]</sup>              | 1.725   | 1.866  | 1.128   | 1.5    |
| $\Delta H_{\text{melt},\infty}$ (J/mol-1) <sup>[S7]</sup>   | 17480   | 22175  | 12552   | 16736  |

**Table S2:** Calculated  $\Phi$  values for truncated-octahedral NPs 3-10 nm in diameter

|      | T (K)    |          | $\Delta H$ (J mol <sup>-1</sup> ) |          | $\Omega_s$ (J mol <sup>-1</sup> ) |          | $\Omega_i$ (J mol <sup>-1</sup> ) |          | $\Phi/\Phi_\infty$ |       |
|------|----------|----------|-----------------------------------|----------|-----------------------------------|----------|-----------------------------------|----------|--------------------|-------|
|      | Ni       | Pt       | Ni                                | Pt       | Ni                                | Pt       | Ni                                | Pt       | Ni                 | Pt    |
| Bulk | 1728.3   | 1828     | 17480                             | 22175    | 148913                            |          | 157685                            |          | —                  |       |
| 3nm  | 1176.914 | 1050.330 | 11903.88                          | 11420.13 | 101409.8                          | 76690.2  | 107383.5                          | 81207.78 | 0.681              | 0.515 |
| 4nm  | 1315.236 | 1162.608 | 13302.28                          | 14103.3  | 113322.8                          | 94708.67 | 119998.3                          | 100287.7 | 0.761              | 0.636 |
| 5nm  | 1397.468 | 1446.798 | 14133.97                          | 15715.28 | 120408                            | 105533.7 | 127500.9                          | 111750.4 | 0.809              | 0.709 |
| 6nm  | 1451.772 | 1383.796 | 14683.2                           | 16786.48 | 125086.9                          | 112727.1 | 132455.4                          | 119367.5 | 0.84               | 0.757 |
| 7nm  | 1491.992 | 1616.713 | 15089.98                          | 17560.92 | 128552.3                          | 117927.8 | 136124.9                          | 124874.5 | 0.863              | 0.792 |
| 8nm  | 1520.904 | 1495.304 | 15382.4                           | 18139.15 | 131043.4                          | 121810.8 | 138762.8                          | 128986.3 | 0.88               | 0.818 |
| 10nm | 1562.383 | 1561.112 | 15801.92                          | 18937.45 | 134617.4                          | 127171.7 | 142547.2                          | 134663   | 0.904              | 0.854 |
|      | Au       | Pd       | Au                                | Pd       | Au                                | Pd       | Au                                | Pd       | Au                 | Pd    |
| Bulk | 1337.33  | 1828     | 12552                             | 16736    | 138714                            |          | 148771                            |          | —                  |       |
| 3nm  | 774.3141 | 742.168  | 7267.608                          | 6794.816 | 80315.41                          | 56317.88 | 86138.41                          | 60401.03 | 0.579              | 0.406 |
| 4nm  | 915.359  | 1013.253 | 8585.568                          | 9271.744 | 94880.38                          | 76847.56 | 101759.4                          | 82419.13 | 0.684              | 0.554 |
| 5nm  | 1000.323 | 1175.404 | 9388.896                          | 10761.25 | 103758.1                          | 89193.1  | 111280.7                          | 95659.75 | 0.748              | 0.643 |
| 6nm  | 1056.016 | 1284.835 | 9916.08                           | 11765.41 | 109584.1                          | 97515.94 | 117529.1                          | 104586   | 0.790              | 0.703 |
| 7nm  | 1096.611 | 1361.86  | 10292.64                          | 12468.32 | 113745.5                          | 103341.9 | 121992.2                          | 110834.4 | 0.82               | 0.745 |
| 8nm  | 1126.344 | 1420.626 | 10568.78                          | 13003.87 | 116797.2                          | 107780.8 | 125265.2                          | 115595.1 | 0.842              | 0.777 |
| 10nm | 1168.826 | 1502.616 | 10970.45                          | 13756.99 | 121236                            | 114022.9 | 130025.9                          | 122289.8 | 0.874              | 0.822 |
|      | Pd       | Pt       | Pd                                | Pt       | Pd                                | Pt       | Pd                                | Pt       | Pd                 | Pt    |
| Bulk | 1828     | 2041.5   | 16736                             | 22175    | 33897                             |          | 34347                             |          | —                  |       |
| 3nm  | 742.168  | 1051.373 | 6794.816                          | 11420.13 | 13762.18                          | 17456.96 | 13944.88                          | 17688.71 | 0.406              | 0.515 |
| 4nm  | 1013.253 | 1297.993 | 9271.744                          | 14103.3  | 18778.94                          | 21558.49 | 19028.24                          | 21844.69 | 0.554              | 0.636 |
| 5nm  | 1175.404 | 1447.424 | 10761.25                          | 15722.08 | 21795.77                          | 24032.97 | 22085.12                          | 24352.02 | 0.643              | 0.709 |
| 6nm  | 1284.835 | 1545.829 | 11765.41                          | 16786.48 | 23829.59                          | 25660.03 | 24145.94                          | 26000.68 | 0.703              | 0.757 |
| 7nm  | 1361.86  | 1616.868 | 12468.32                          | 17562.6  | 25253.27                          | 26846.42 | 25588.52                          | 27202.82 | 0.745              | 0.792 |
| 8nm  | 1420.626 | 1669.746 | 13003.87                          | 18139.15 | 26337.97                          | 27727.75 | 26687.62                          | 28095.85 | 0.777              | 0.818 |
| 10nm | 1502.616 | 1743.441 | 13756.99                          | 18937.45 | 27863.33                          | 28948.04 | 28233.23                          | 29332.34 | 0.822              | 0.854 |

### 3. Results and Discussion

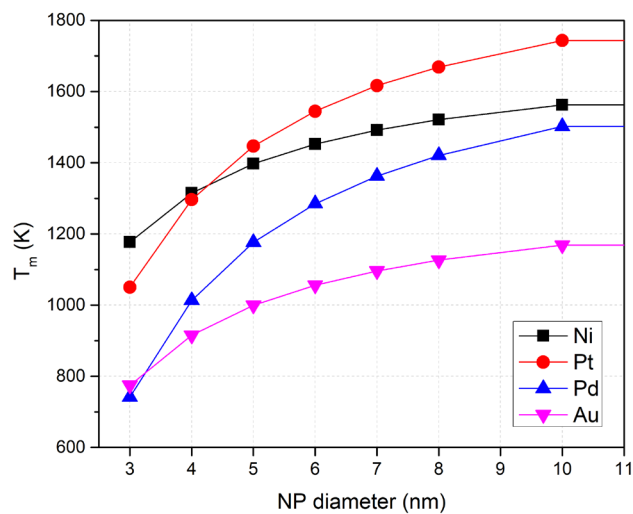

**Figure S1:** Melting points as a function of NP diameter for all monometallic systems studied here, indicating the different rates of melting point depression among different elements.

**Movie S1:** MD study of coalescence between monometallic Pd and Pt NPs at 1200 K. The temperature is below the NPs' melting points. Amorphous, partially segregated NPs emerged, with a tendency of Pd atoms to occupy surface sites.

**Movie S2:** MD study of coalescence between monometallic Pd and Pt NPs at 1600 K. The temperature is above the NPs' melting points. Liquid, mixed NPs emerged, which, upon cooling, may result in cored, partially demixed NPs.

## References

- S1. J. Hildebrand, The term ‘regular solution’, *Nature* 168, 868 (1951).  
<https://doi.org/10.1038/168868a0>
- S2. B.S. Bokstein, M.I. Mendelev, D.J. Srolovitz, *Thermodynamics and kinetics in materials science: a short course*, Oxford University Press, Oxford, UK (2005).  
 ISBN 0 19 852803 5 (Hbk) 978-0-19-852803-6  
 ISBN 0 19 852804 3 (Pbk) 978-0-19-852804-3
- S3. G. Guisbiers, S. Mejia-Rosales, S. Khanal, F. Ruiz-Zepeda, R.L. Whetten, M. José-Yacamán, Gold-copper nanoalloy, “Tumbaga”, in the era of nano: phase diagram and segregation, *Nano Lett* 14, 6718 (2014).  
<https://doi.org/10.1021/nl503584q>
- S4. G. Guisbiers, G. Abudukelimu, Influence of nanomorphology on the melting and catalytic properties of convex polyhedral nanoparticles, *J Nanopart Res* 15, 1431 (2013).  
<https://doi.org/10.1007/s11051-013-1431-x>
- S5. J.D. Honeycutt, H.C. Andersen, Molecular dynamics study of melting and freezing of small Lennard-Jones clusters, *J Phys Chem* 91:19, 4950–4963 (1987).  
<https://doi.org/10.1021/j100303a014>
- S6. G. Guisbiers, S. Khanal, F. Ruiz-Zepeda, J. Roque de la Puente, M. José-Yacamán, Cu-Ni nano-alloy: mixed, core-shell or Janus nano-particle?, *Nanoscale* 6, 14630 (2014).  
<https://doi.org/10.1039/C4NR05739B>
- S7. *Springer Handbook of Condensed Matter and Materials Data*, W. Martienssen and H. Warlimont eds. Springer, Heidelberg, (2005) p.124, 125, 60, 61.  
<https://doi.org/10.1007/3-540-30437-1>
- S8. L. Vitos, A.V. Ruban, H.L. Skriver, J. Kollár, The surface energy of metals, *Surf Sci*, 411:1–2, 186 (1998).  
[https://doi.org/10.1016/S0039-6028\(98\)00363-X](https://doi.org/10.1016/S0039-6028(98)00363-X)
